# Supplementary material
Source: MDPI journal article supplement (https://www.mdpi.com/2304-6740/6/4/109)
Supplement: s1 [file s1]

## checkCIF (basic structural check) running

---

## checkCIF/PLATON (basic structural check)

---

You have not supplied any structure factors. As a result the full set of tests cannot be run.

No syntax errors found.  
Please wait while processing ....

[CIF dictionary](#)  
[Interpreting this report](#)

## Datablock: BaLiGaSb

---

|                 |                                                |                    |
|-----------------|------------------------------------------------|--------------------|
| Bond precision: | Sb-Sb = 0.0013 Å                               | Wavelength=0.71073 |
| Cell:           | a=18.105(6)      b=4.9319(15)      c=13.023(4) |                    |
|                 | alpha=90      beta=126.676(4)      gamma=90    |                    |
| Temperature:    | 200 K                                          |                    |

|                        |                                                                       |                                                                       |
|------------------------|-----------------------------------------------------------------------|-----------------------------------------------------------------------|
|                        | Calculated                                                            | Reported                                                              |
| Volume                 | 932.6(5)                                                              | 932.6(5)                                                              |
| Space group            | C 2/m                                                                 | C 2/m                                                                 |
| Hall group             | -C 2y                                                                 | -C 2y                                                                 |
| Moiety formula         | Sb <sub>2</sub> , 4(Ba), 4(Sb), 0.334(Ga), 6.666(Li)                  | ?                                                                     |
| Sum formula            | Ba <sub>4</sub> Ga <sub>0.33</sub> Li <sub>6.67</sub> Sb <sub>6</sub> | Ba <sub>4</sub> Ga <sub>0.35</sub> Li <sub>6.65</sub> Sb <sub>6</sub> |
| Mr                     | 1349.43                                                               | 1350.41                                                               |
| Dx,g cm <sup>-3</sup>  | 4.806                                                                 | 4.809                                                                 |
| Z                      | 2                                                                     | 2                                                                     |
| Mu (mm <sup>-1</sup> ) | 17.272                                                                | 17.294                                                                |
| F000                   | 1120.7                                                                | 1122.0                                                                |
| F000'                  | 1111.74                                                               |                                                                       |
| h,k,lmax               | 23,6,16                                                               | 23,6,16                                                               |
| Nref                   | 1161                                                                  | 1162                                                                  |
| Tmin,Tmax              | 0.459,0.527                                                           | 0.321,0.467                                                           |
| Tmin'                  | 0.236                                                                 |                                                                       |

Correction method= # Reported T Limits: Tmin=0.321 Tmax=0.467  
AbsCorr = MULTI-SCAN

Data completeness= 1.001      Theta(max)= 27.232  
R(reflections)= 0.0263( 1042)      wR2(reflections)= 0.0592( 1162)  
S = 1.071      Npar= 41

---

The following ALERTS were generated. Each ALERT has the format

**test-name\_ALERT\_alert-type\_alert-level.**

Click on the hyperlinks for more details of the test.

---

### ● Alert level C

**ABSTY02\_ALERT\_1\_C** An \_exptl\_absorpt\_correction\_type has been given without a literature citation. This should be contained in the \_exptl\_absorpt\_process\_details field.  
Absorption correction given as multi-scan

|                                                                           |                |              |
|---------------------------------------------------------------------------|----------------|--------------|
| <b>PLAT041_ALERT_1_C</b> Calc. and Reported SumFormula                    | Strings Differ | Please Check |
| <b>PLAT068_ALERT_1_C</b> Reported F000 Differs from Calcd (or Missing)... |                | Please Check |
| <b>PLAT077_ALERT_4_C</b> Unitcell Contains Non-integer Number of Atoms .. |                | Please Check |
| <b>PLAT094_ALERT_2_C</b> Ratio of Maximum / Minimum Residual Density .... | 2.32           | Report       |
| <b>PLAT202_ALERT_3_C</b> Isotropic non-H Atoms in Anion/Solvent .....     | 4              | Check        |

---

### ● Alert level G

**FORMU01\_ALERT\_2\_G** There is a discrepancy between the atom counts in the \_chemical\_formula\_sum and the formula from the \_atom\_site\* data.  
Atom count from \_chemical\_formula\_sum: Ba<sub>4</sub> Ga<sub>0.35</sub> Li<sub>6.65</sub> Sb<sub>6</sub>  
Atom count from the \_atom\_site data: Ba<sub>4</sub> Ga<sub>0.334</sub> Li<sub>6.666</sub> Sb<sub>6</sub>

**CELLZ01\_ALERT\_1\_G** Difference between formula and atom\_site contents detected.

CELLZ01\_ALERT\_1\_G ALERT: check formula stoichiometry or atom site occupancies.

From the CIF: \_cell\_formula\_units\_Z 2

From the CIF: \_chemical\_formula\_sum Ba4 Ga0.35 Li6.65 Sb6

TEST: Compare cell contents of formula and atom\_site data

| atom | Z*formula | cif sites | diff  |
|------|-----------|-----------|-------|
| Ba   | 8.00      | 8.00      | 0.00  |
| Ga   | 0.70      | 0.67      | 0.03  |
| Li   | 13.30     | 13.33     | -0.03 |
| Sb   | 12.00     | 12.00     | 0.00  |

PLAT005\_ALERT\_5\_G No Embedded Refinement Details Found in the CIF Please Do !

PLAT128\_ALERT\_4\_G Alternate Setting for Input Space Group C2/m 12/m Note

PLAT302\_ALERT\_4\_G Anion/Solvent/Minor-Residue Disorder (Resd 6 ) 100% Note

PLAT302\_ALERT\_4\_G Anion/Solvent/Minor-Residue Disorder (Resd 9 ) 100% Note

PLAT304\_ALERT\_4\_G Non-Integer Number of Atoms in ..... Resd 1 1.50 Check

#### And 9 other PLAT304 Alerts

More ...

PLAT802\_ALERT\_4\_G CIF Input Record(s) with more than 80 Characters 1 Info

0 **ALERT level A** = Most likely a serious problem - resolve or explain

0 **ALERT level B** = A potentially serious problem, consider carefully

6 **ALERT level C** = Check. Ensure it is not caused by an omission or oversight

18 **ALERT level G** = General information/check it is not something unexpected

5 ALERT type 1 CIF construction/syntax error, inconsistent or missing data

2 ALERT type 2 Indicator that the structure model may be wrong or deficient

1 ALERT type 3 Indicator that the structure quality may be low

15 ALERT type 4 Improvement, methodology, query or suggestion

1 ALERT type 5 Informative message, check

## Datablock: BaLiInSb

Bond precision: Sb-Sb = 0.0008 A Wavelength=0.71073

Cell: a=18.146(3) b=4.9397(9) c=13.080(2)

alpha=90 beta=126.680(2) gamma=90

Temperature: 200 K

|                | Calculated                               | Reported              |
|----------------|------------------------------------------|-----------------------|
| Volume         | 940.3(3)                                 | 940.3(3)              |
| Space group    | C 2/m                                    | C 2/m                 |
| Hall group     | -C 2y                                    | -C 2y                 |
| Moiety formula | In1.15 Sb8, 2(Sb2), 8(Ba),<br>12.848(Li) | ?                     |
| Sum formula    | Ba8 In1.15 Li12.85 Sb12                  | Ba4 In0.55 Li6.40 Sb6 |
| Mr             | 2781.20                                  | 1387.43               |
| Dx, g cm-3     | 4.911                                    | 4.900                 |
| Z              | 1                                        | 2                     |
| Mu (mm-1)      | 17.351                                   | 17.321                |
| F000           | 1155.0                                   | 1152.0                |
| F000'          | 1145.04                                  |                       |
| h,k,lmax       | 23,6,16                                  | 23,6,16               |
| Nref           | 1173                                     | 1174                  |
| Tmin,Tmax      | 0.478,0.555                              | 0.372,0.493           |
| Tmin'          | 0.243                                    |                       |

Correction method= # Reported T Limits: Tmin=0.372 Tmax=0.493

AbsCorr = MULTI-SCAN

Data completeness= 1.001 Theta(max)= 27.249

R(reflections)= 0.0220( 1060) wR2(reflections)= 0.0504( 1174)

S = 1.037 Npar= 43

The following ALERTS were generated. Each ALERT has the format

**test-name\_ALERT\_alert-type\_alert-level.**

Click on the hyperlinks for more details of the test.

## ● Alert level C

**ABSTY02\_ALERT\_1\_C** An \_exptl\_absorpt\_correction\_type has been given without a literature citation. This should be contained in the \_exptl\_absorpt\_process\_details field.

Absorption correction given as multi-scan

**PLAT041\_ALERT\_1\_C** Calc. and Reported SumFormula Strings Differ Please Check

**PLAT043\_ALERT\_1\_C** Calculated and Reported Mol. Weight Differ by .. 6.34 Check

**PLAT068\_ALERT\_1\_C** Reported F000 Differs from Calcd (or Missing)... Please Check

**PLAT077\_ALERT\_4\_C** Unitcell Contains Non-integer Number of Atoms .. Please Check

**PLAT202\_ALERT\_3\_C** Isotropic non-H Atoms in Anion/Solvent ..... 4 Check

## ● Alert level G

**FORMU01\_ALERT\_2\_G** There is a discrepancy between the atom counts in the \_chemical\_formula\_sum and the formula from the \_atom\_site\* data.

Atom count from \_chemical\_formula\_sum: Ba4 In0.55 Li6.4 Sb6

Atom count from the \_atom\_site data: Ba4 In0.576 Li6.424 Sb6

**CELLZ01\_ALERT\_1\_G** Difference between formula and atom\_site contents detected.

**CELLZ01\_ALERT\_1\_G** ALERT: check formula stoichiometry or atom site occupancies.

From the CIF: \_cell\_formula\_units\_Z 2

From the CIF: \_chemical\_formula\_sum Ba4 In0.55 Li6.40 Sb6

TEST: Compare cell contents of formula and atom\_site data

| atom | Z*formula | cif sites | diff  |
|------|-----------|-----------|-------|
| Ba   | 8.00      | 8.00      | 0.00  |
| In   | 1.10      | 1.15      | -0.05 |
| Li   | 12.80     | 12.85     | -0.05 |
| Sb   | 12.00     | 12.00     | 0.00  |

**PLAT004\_ALERT\_5\_G** Polymeric Structure Found with Maximum Dimension 1 Info

**PLAT005\_ALERT\_5\_G** No Embedded Refinement Details Found in the CIF Please Do !

**PLAT045\_ALERT\_1\_G** Calculated and Reported Z Differ by a Factor ... 0.50 Check

**PLAT128\_ALERT\_4\_G** Alternate Setting for Input Space Group C2/m I2/m Note

**PLAT301\_ALERT\_3\_G** Main Residue Disorder .....(Resd 1 ) 13% Note

**PLAT302\_ALERT\_4\_G** Anion/Solvent/Minor-Residue Disorder (Resd 7 ) 100% Note

0 **ALERT level A** = Most likely a serious problem - resolve or explain

0 **ALERT level B** = A potentially serious problem, consider carefully

6 **ALERT level C** = Check. Ensure it is not caused by an omission or oversight

9 **ALERT level G** = General information/check it is not something unexpected

7 ALERT type 1 CIF construction/syntax error, inconsistent or missing data

1 ALERT type 2 Indicator that the structure model may be wrong or deficient

2 ALERT type 3 Indicator that the structure quality may be low

3 ALERT type 4 Improvement, methodology, query or suggestion

2 ALERT type 5 Informative message, check

## Datablock: BaLiInBi

|                    |                                         |                       |
|--------------------|-----------------------------------------|-----------------------|
| Bond precision:    | Sb-Sb = 0.0000 A                        | Wavelength=0.71073    |
| Cell:              | a=18.4090(13) b=5.0133(4) c=13.2823(10) |                       |
|                    | alpha=90 beta=126.2927(11) gamma=90     |                       |
| Temperature: 200 K |                                         |                       |
|                    | Calculated                              | Reported              |
| Volume             | 988.02(13)                              | 988.02(13)            |
| Space group        | C 2/m                                   | C 2/m                 |
| Hall group         | -C 2y                                   | -C 2y                 |
| Moiety formula     | Bi8 In0.92, 4(Bi), 8(Ba), 13.08(Li)     | ?                     |
| Sum formula        | Ba8 Bi12 In0.92 Li13.08                 | Ba4 Bi6 In0.45 Li6.55 |
| Mr                 | 3802.81                                 | 1900.37               |
| Dx, g cm-3         | 6.391                                   | 6.388                 |

|           |             |             |
|-----------|-------------|-------------|
| Z         | 1           | 2           |
| Mu (mm-1) | 61.538      | 61.527      |
| F000      | 1528.3      | 1527.0      |
| F000'     | 1482.00     |             |
| h,k,lmax  | 23,6,17     | 23,6,17     |
| Nref      | 1243        | 1243        |
| Tmin,Tmax | 0.011,0.021 | 0.014,0.041 |
| Tmin'     | 0.000       |             |

Correction method= # Reported T Limits: Tmin=0.014 Tmax=0.041  
AbsCorr = MULTI-SCAN  
Data completeness= 1.000                      Theta(max)= 27.250  
R(reflections)= 0.0256( 1158)                      wR2(reflections)= 0.0623( 1243)  
S = 1.039                      Npar= 42

The following ALERTS were generated. Each ALERT has the format

**test-name\_ALERT\_alert-type\_alert-level.**

Click on the hyperlinks for more details of the test.

## ●Alert level C

PLAT041\_ALERT\_1\_C Calc. and Reported SumFormula Strings Differ Please Check  
PLAT068\_ALERT\_1\_C Reported F000 Differs from Calcd (or Missing)... Please Check  
PLAT077\_ALERT\_4\_C Unitcell Contains Non-integer Number of Atoms .. Please Check  
PLAT202\_ALERT\_3\_C Isotropic non-H Atoms in Anion/Solvent ..... 4 Check

## ●Alert level G

FORMU01\_ALERT\_2\_G There is a discrepancy between the atom counts in the  
\_chemical\_formula\_sum and the formula from the \_atom\_site\* data.  
Atom count from \_chemical\_formula\_sum: Ba4 Bi6 In0.45 Li6.55  
Atom count from the \_atom\_site data: Ba4 Bi6 In0.46 Li6.54  
PLAT004\_ALERT\_5\_G Polymeric Structure Found with Maximum Dimension 1 Info  
PLAT005\_ALERT\_5\_G No Embedded Refinement Details Found in the CIF Please Do !  
PLAT045\_ALERT\_1\_G Calculated and Reported Z Differ by a Factor ... 0.50 Check  
PLAT083\_ALERT\_2\_G SHELXL Second Parameter in WGHT Unusually Large 9.25 Why ?  
PLAT128\_ALERT\_4\_G Alternate Setting for Input Space Group C2/m I2/m Note  
PLAT301\_ALERT\_3\_G Main Residue Disorder .....(Resd 1 ) 10% Note  
PLAT302\_ALERT\_4\_G Anion/Solvent/Minor-Residue Disorder (Resd 7 ) 100% Note

0 **ALERT level A** = Most likely a serious problem - resolve or explain

0 **ALERT level B** = A potentially serious problem, consider carefully

4 **ALERT level C** = Check. Ensure it is not caused by an omission or oversight

8 **ALERT level G** = General information/check it is not something unexpected

3 ALERT type 1 CIF construction/syntax error, inconsistent or missing data

2 ALERT type 2 Indicator that the structure model may be wrong or deficient

2 ALERT type 3 Indicator that the structure quality may be low

3 ALERT type 4 Improvement, methodology, query or suggestion

2 ALERT type 5 Informative message, check

## Datablock: EuLiInBi

|                    |                                               |                       |
|--------------------|-----------------------------------------------|-----------------------|
| Bond precision:    | Bi-Eu = 0.0009 A                              | Wavelength=0.71073    |
| Cell:              | a=17.607(3)      b=4.8222(8)      c=12.826(2) |                       |
|                    | alpha=90      beta=125.9287(17)      gamma=90 |                       |
| Temperature: 200 K |                                               |                       |
|                    | Calculated                                    | Reported              |
| Volume             | 881.8(3)                                      | 881.8(2)              |
| Space group        | C 2/m                                         | C 2/m                 |
| Hall group         | -C 2y                                         | -C 2y                 |
| Moiety formula     | Bi12 Eu8 In0.79, 13.208(Li)                   | ?                     |
| Sum formula        | Bi12 Eu8 In0.79 Li13.21                       | Bi6 Eu4 In0.40 Li6.60 |
| Mr                 | 3906.12                                       | 1953.45               |

|           |             |             |
|-----------|-------------|-------------|
| Dx,g cm-3 | 7.356       | 7.357       |
| Z         | 1           | 2           |
| Mu (mm-1) | 74.086      | 74.091      |
| F000      | 1578.4      | 1579.0      |
| F000'     | 1534.23     |             |
| h,k,lmax  | 22,6,16     | 22,6,16     |
| Nref      | 1113        | 1113        |
| Tmin,Tmax | 0.047,0.081 | 0.028,0.087 |
| Tmin'     | 0.002       |             |

Correction method= # Reported T Limits: Tmin=0.028 Tmax=0.087  
AbsCorr = MULTI-SCAN  
Data completeness= 1.000                      Theta(max)= 27.227  
R(reflections)= 0.0251( 1010)                      wR2(reflections)= 0.0609( 1113)  
S = 1.119                      Npar= 43

The following ALERTS were generated. Each ALERT has the format

**test-name\_ALERT\_alert-type\_alert-level.**

Click on the hyperlinks for more details of the test.

## ● Alert level C

**ABSTY02\_ALERT\_1\_C** An \_exptl\_absorpt\_correction\_type has been given without a literature citation. This should be contained in the \_exptl\_absorpt\_process\_details field.

Absorption correction given as multi-scan

**PLAT077\_ALERT\_4\_C** Unitcell Contains Non-integer Number of Atoms .. Please Check

**PLAT202\_ALERT\_3\_C** Isotropic non-H Atoms in Anion/Solvent ..... 4 Check

## ● Alert level G

**PLAT004\_ALERT\_5\_G** Polymeric Structure Found with Maximum Dimension 3 Info

**PLAT005\_ALERT\_5\_G** No Embedded Refinement Details Found in the CIF Please Do !

**PLAT045\_ALERT\_1\_G** Calculated and Reported Z Differ by a Factor ... 0.50 Check

**PLAT068\_ALERT\_1\_G** Reported F000 Differs from Calcd (or Missing)... Please Check

**PLAT128\_ALERT\_4\_G** Alternate Setting for Input Space Group C2/m I2/m Note

**PLAT301\_ALERT\_3\_G** Main Residue Disorder .....(Resd 1 ) 4% Note

**PLAT302\_ALERT\_4\_G** Anion/Solvent/Minor-Residue Disorder (Resd 4 ) 100% Note

0 **ALERT level A** = Most likely a serious problem - resolve or explain

0 **ALERT level B** = A potentially serious problem, consider carefully

3 **ALERT level C** = Check. Ensure it is not caused by an omission or oversight

7 **ALERT level G** = General information/check it is not something unexpected

3 ALERT type 1 CIF construction/syntax error, inconsistent or missing data

0 ALERT type 2 Indicator that the structure model may be wrong or deficient

2 ALERT type 3 Indicator that the structure quality may be low

3 ALERT type 4 Improvement, methodology, query or suggestion

2 ALERT type 5 Informative message, check

## Datablock: BaLiBi

Bond precision: Bi-Eu = 0.0000 A Wavelength=0.71073

Cell: a=18.407(3) b=5.0258(9) c=18.353(3)  
alpha=90 beta=104.426(3) gamma=90

Temperature: 200 K

|                | Calculated            | Reported      |
|----------------|-----------------------|---------------|
| Volume         | 1644.3(5)             | 1644.3(5)     |
| Space group    | C 2/m                 | C 2/m         |
| Hall group     | -C 2y                 | -C 2y         |
| Moiety formula | 10(Bi), 7(Ba), 11(Li) | ?             |
| Sum formula    | Ba7 Bi10 Li11         | Ba7 Bi10 Li11 |
| Mr             | 3127.45               | 3127.52       |

|                                                               |                                 |             |
|---------------------------------------------------------------|---------------------------------|-------------|
| Dx,g cm <sup>-3</sup>                                         | 6.317                           | 6.317       |
| $\frac{2}{\lambda}$                                           | 2                               | 2           |
| Mu (mm <sup>-1</sup> )                                        | 61.494                          | 61.493      |
| F000                                                          | 2510.0                          | 2510.0      |
| F000'                                                         | 2433.83                         |             |
| h,k,lmax                                                      | 23,6,23                         | 23,6,23     |
| Nref                                                          | 2063                            | 2063        |
| Tmin,Tmax                                                     | 0.098,0.292                     | 0.097,0.216 |
| Tmin'                                                         | 0.074                           |             |
| Correction method= # Reported T Limits: Tmin=0.097 Tmax=0.216 |                                 |             |
| AbsCorr = MULTI-SCAN                                          |                                 |             |
| Data completeness= 1.000                                      | Theta(max)= 27.247              |             |
| R(reflections)= 0.0298( 1689)                                 | wR2(reflections)= 0.0651( 2063) |             |
| S = 1.054                                                     | Npar= 68                        |             |

The following ALERTS were generated. Each ALERT has the format

**test-name\_ALERT\_alert-type\_alert-level.**

Click on the hyperlinks for more details of the test.

## ●Alert level C

**ABSTY02\_ALERT\_1\_C** An \_exptl\_absorpt\_correction\_type has been given without a literature citation. This should be contained in the \_exptl\_absorpt\_process\_details field.  
Absorption correction given as multi-scan

## ●Alert level G

**PLAT005\_ALERT\_5\_G** No Embedded Refinement Details Found in the CIF Please Do !

**PLAT304\_ALERT\_4\_G** Non-Integer Number of Atoms in ..... Resd 1 0.50 Check

**And 14 other PLAT304 Alerts**

[More ...](#)

**PLAT802\_ALERT\_4\_G** CIF Input Record(s) with more than 80 Characters 2 Info

- 0 **ALERT level A** = Most likely a serious problem - resolve or explain
- 0 **ALERT level B** = A potentially serious problem, consider carefully
- 1 **ALERT level C** = Check. Ensure it is not caused by an omission or oversight
- 17 **ALERT level G** = General information/check it is not something unexpected

- 1 ALERT type 1 CIF construction/syntax error, inconsistent or missing data
- 0 ALERT type 2 Indicator that the structure model may be wrong or deficient
- 0 ALERT type 3 Indicator that the structure quality may be low
- 16 ALERT type 4 Improvement, methodology, query or suggestion
- 1 ALERT type 5 Informative message, check

It is advisable to attempt to resolve as many as possible of the alerts in all categories. Often the minor alerts point to easily fixed oversights, errors and omissions in your CIF or refinement strategy, so attention to these fine details can be worthwhile. In order to resolve some of the more serious problems it may be necessary to carry out additional measurements or structure refinements. However, the purpose of your study may justify the reported deviations and the more serious of these should normally be commented upon in the discussion or experimental section of a paper or in the "special\_details" fields of the CIF. checkCIF was carefully designed to identify outliers and unusual parameters, but every test has its limitations and alerts that are not important in a particular case may appear. Conversely, the absence of alerts does not guarantee there are no aspects of the results needing attention. It is up to the individual to critically assess their own results and, if necessary, seek expert advice.

## Publication of your CIF in IUCr journals

A basic structural check has been run on your CIF. These basic checks will be run on all CIFs submitted for publication in IUCr journals (*Acta Crystallographica*, *Journal of Applied Crystallography*, *Journal of Synchrotron Radiation*); however, if you intend to submit to *Acta Crystallographica Section C* or *E* or *IUCrData*, you should make sure that **full publication checks** are run on the final version of your CIF prior to submission.

## Publication of your CIF in other journals

Please refer to the *Notes for Authors* of the relevant journal for any special instructions relating to CIF submission.

PLATON version of 20/08/2018; check.def file version of 20/08/2018

## Datablock BaLiGaSb - ellipsoid plot

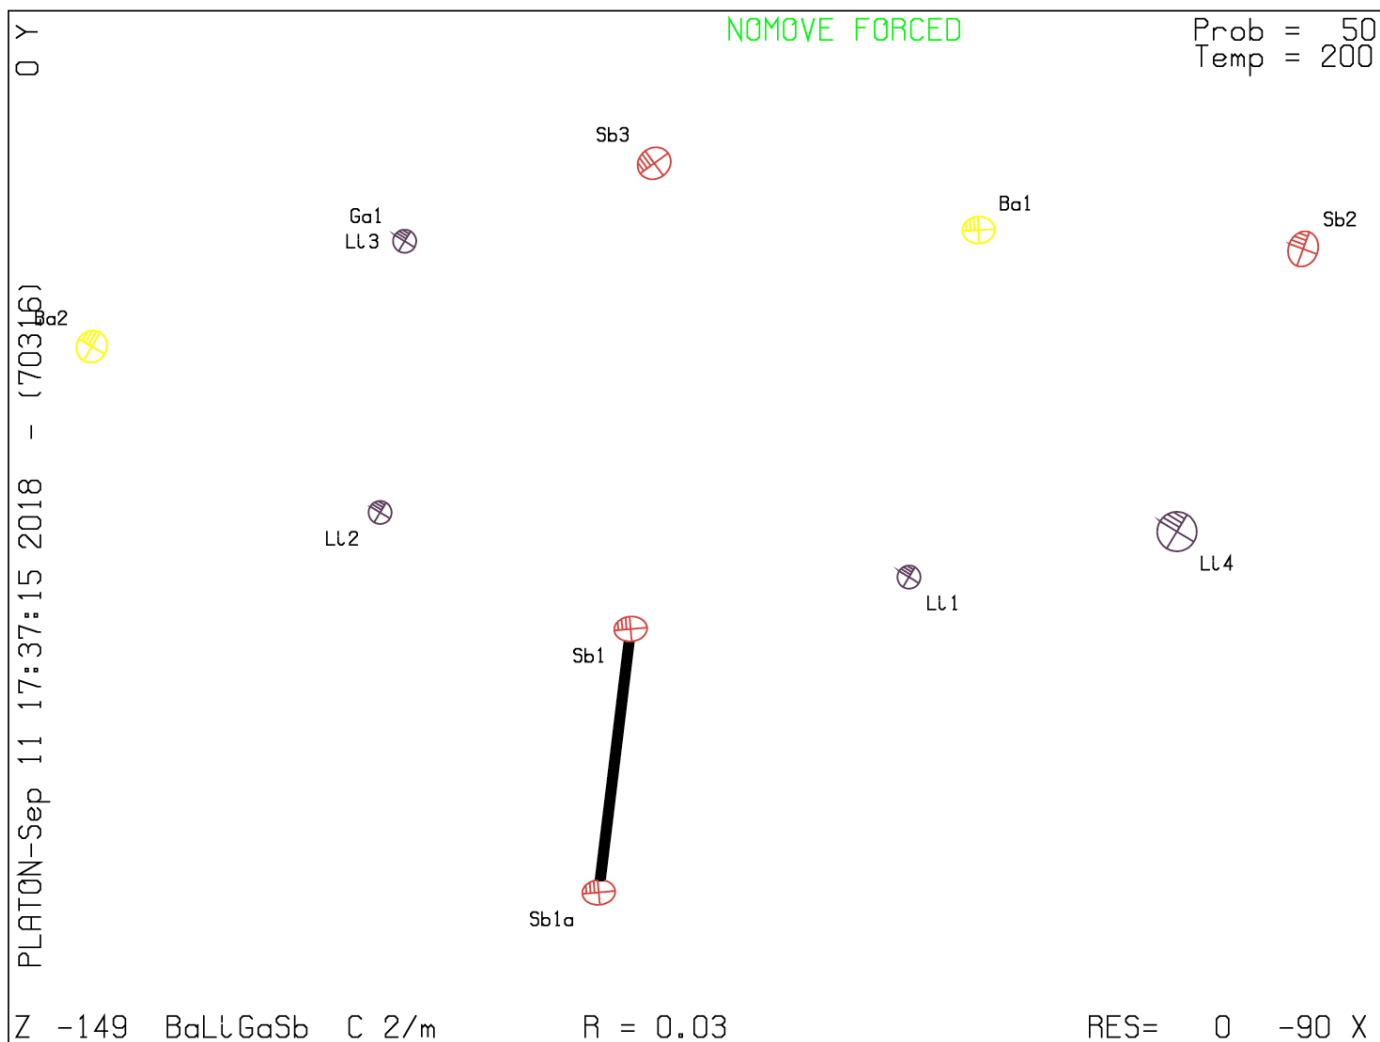

## Datablock BaLiInSb - ellipsoid plot

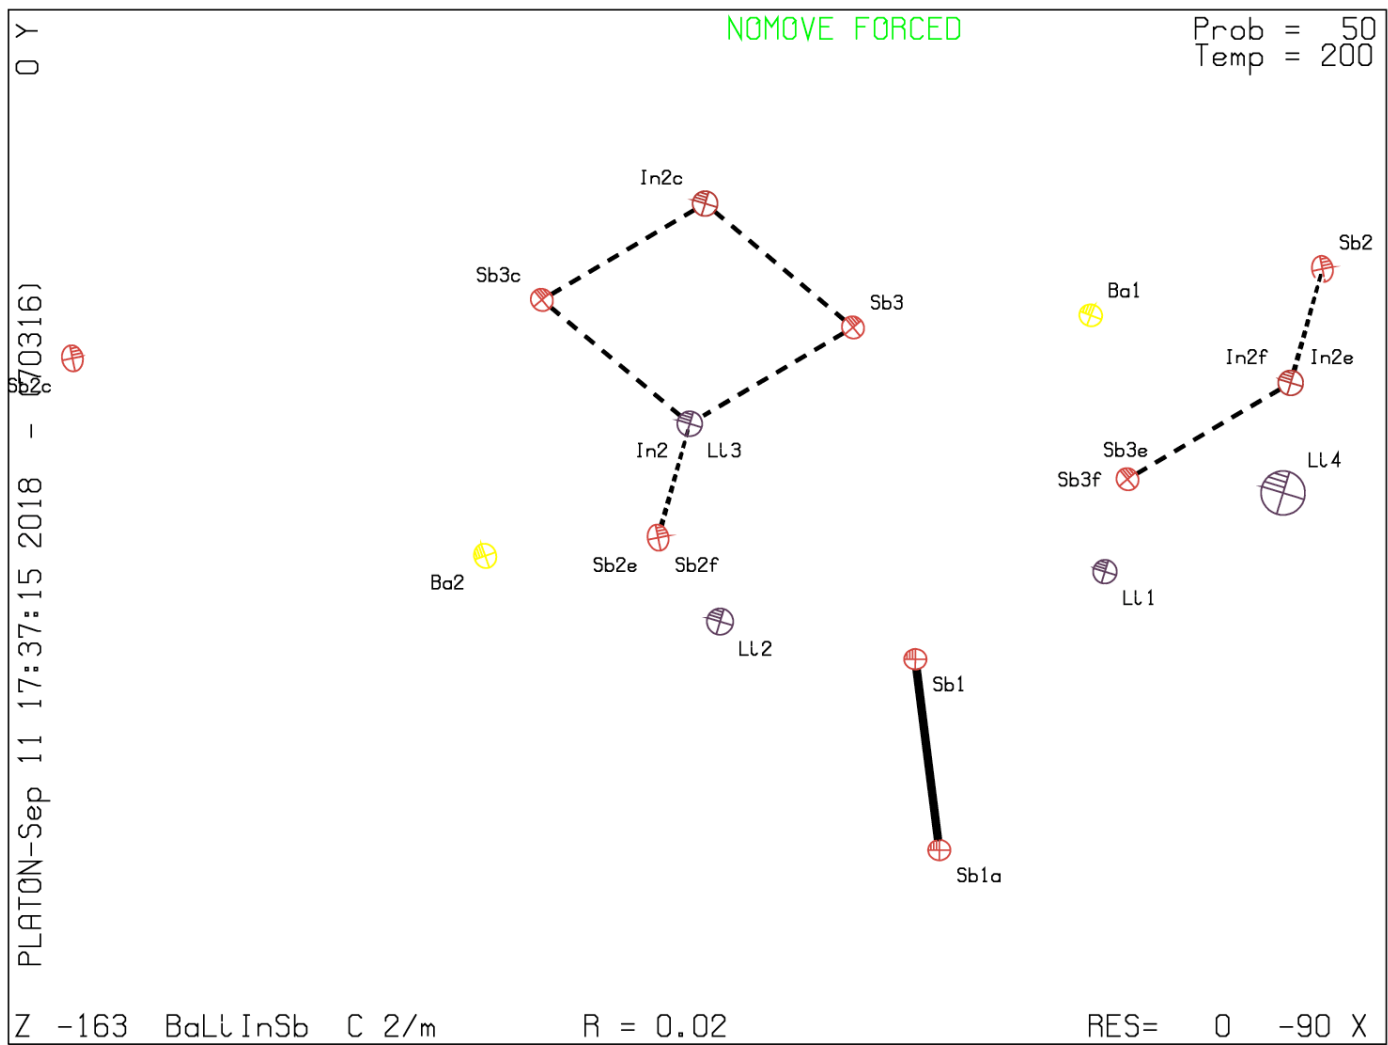

**Datablock BaLiInBi** - ellipsoid plot

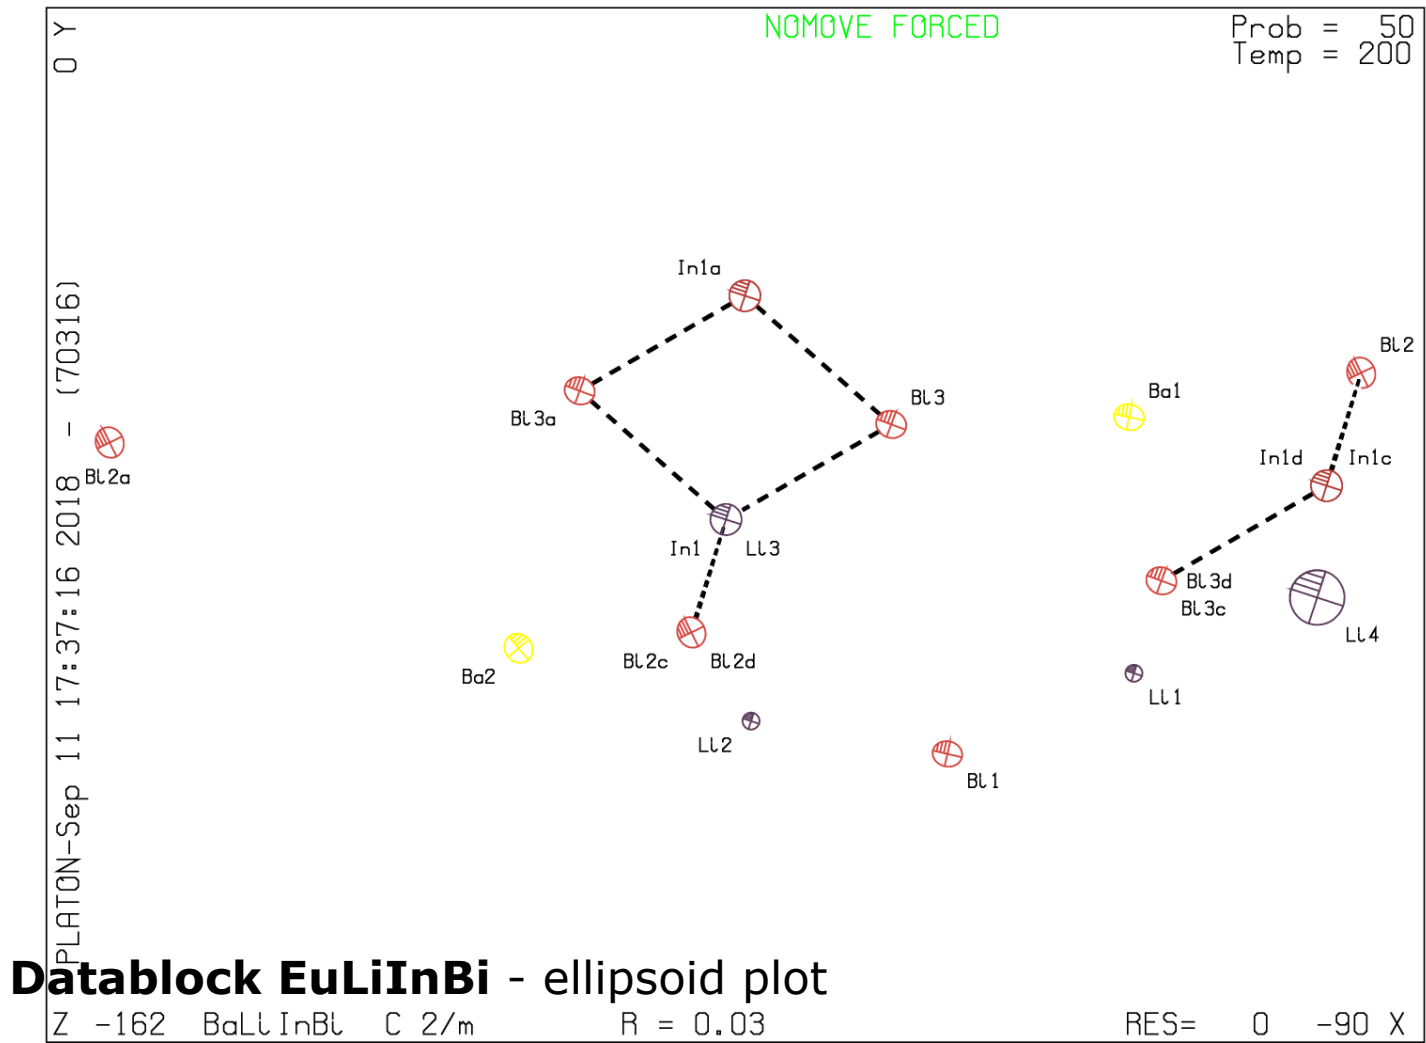

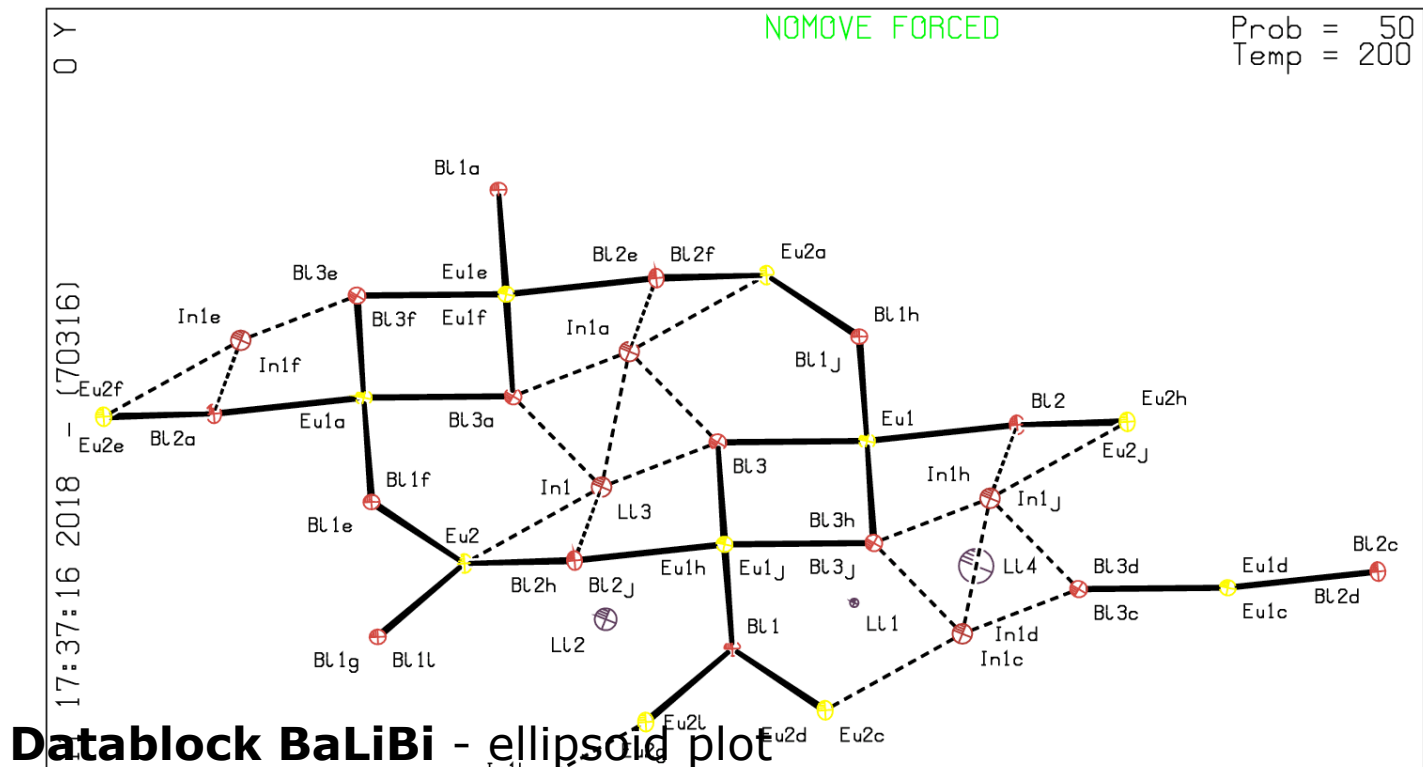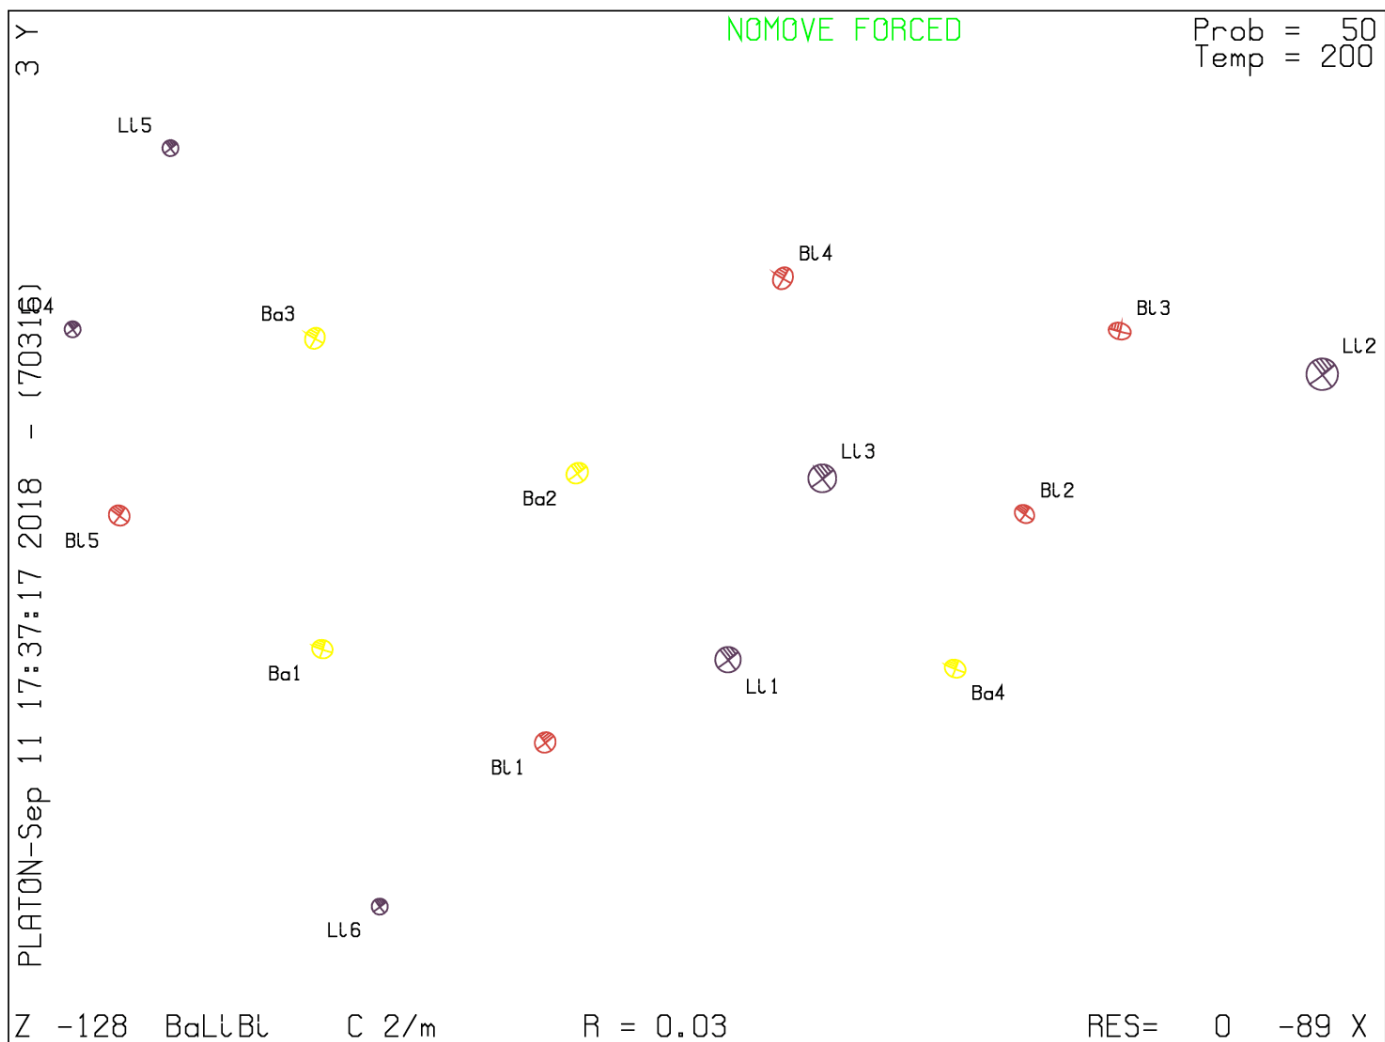

---

[Download CIF editor \(publCIF\) from the IUCr](#)  
[Download CIF editor \(enCIFer\) from the CCDC](#)  
[Test a new CIF entry](#)
